# Supplementary material
Source: Research Square preprint supplement (doi:10.21203/rs.3.rs-9323717/v1)
Supplement: Supplementary file 1 [file 6352dab07a4b3d5a469bd1d0.docx]

Supporting Information for

**Flexible Carbon Nanotube-based Terahertz Devices for Next-generation Wireless Communications**

Yan Li1, Mingyue Fu1, Weifeng Wu1, Xiaowei He1, Rui Chen3,*, Jianwei Han3, Li Ding1,4,*, Sheng Wang1,2,*

1 Key Laboratory for the Physics and Chemistry of Nanodevices and Center for Carbon-Based Electronics, School of Electronics, Peking University, Beijing, China

2 State Key Laboratory of Photonics and Communications

3 National Space Science Center Chinese Academy of Sciences Beijing 100190, P. R. China

4 Chongqing Institute of Carbon-based Integrated Circuits, Peking University, Chongqing, China

* **Corresponding author. Email:** [shengwang@pku.edu.cn](mailto:shengwang@pku.edu.cn) (S.W.); [lding@pku.edu.cn](mailto:lding@pku.edu.cn" \o "mailto:lding@pku.edu.cn) (L.D.); [chenrui2010@nssc.ac.cn](mailto:chenrui2010@nssc.ac.cn) (R.C.)


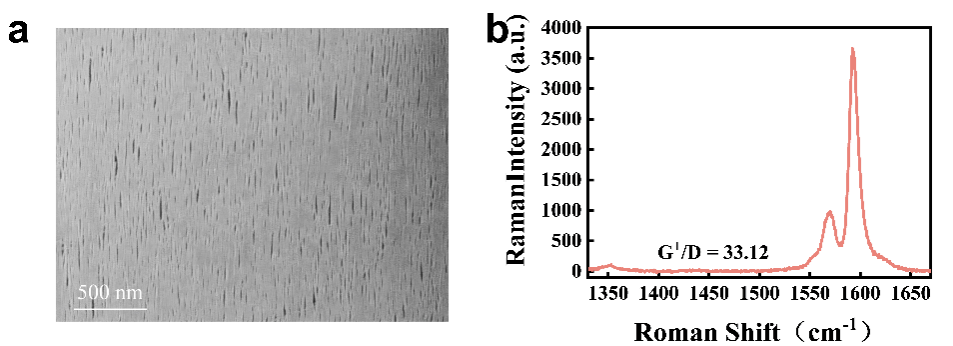


**Fig. S1 | a,** SEM image of the vertically aligned ACNT arrays, with an estimated density exceeding 100 nanotubes per micron, facilitating efficient carrier transport. **b,** Raman spectrum of ACNT arrays, exhibiting a G⁺/D ratio of ~33.12, indicative of high structural quality.


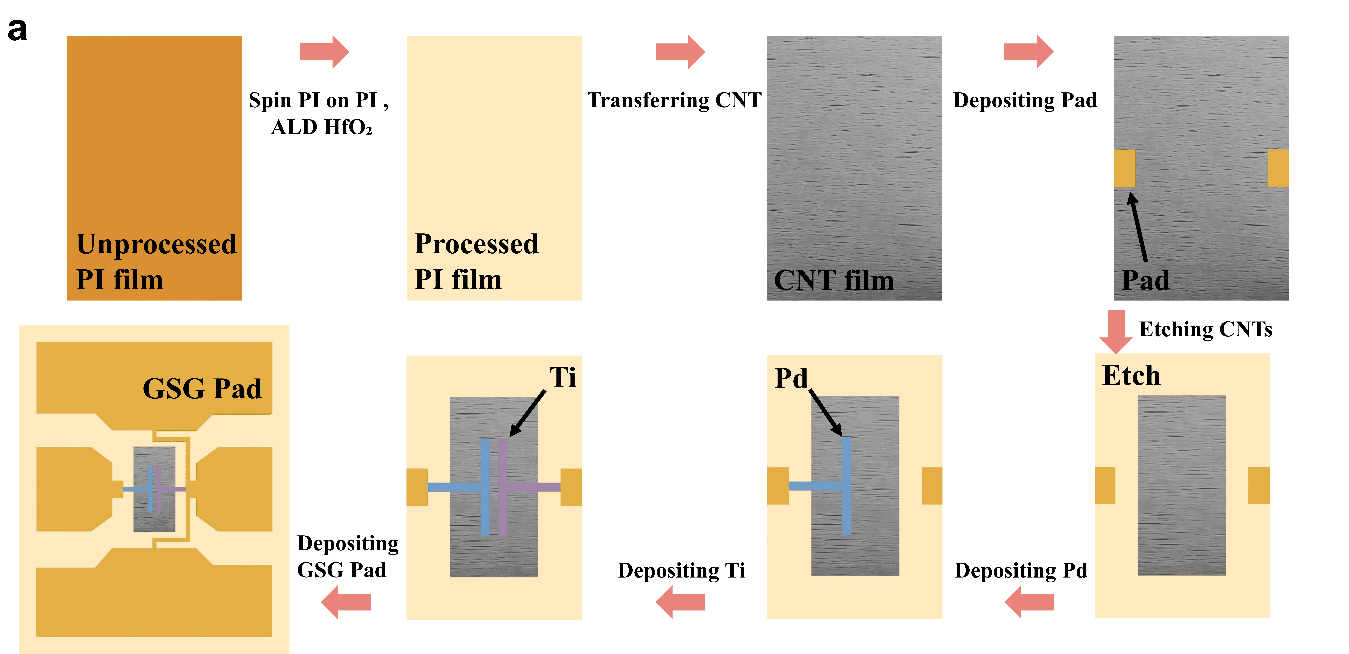


**Fig. S2 | Schematic diagram of the fabrication process of the flexible Schottky diodes based on ACNT arrays.** The detailed process is described in Methods.


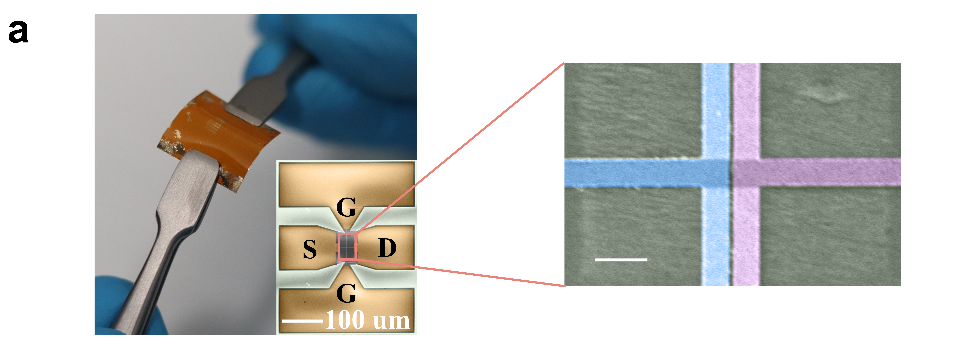


**Fig. S3 |** SEM image of a flexible schottky diodes based on CNTs with a G-S-G structure. The image on the right is an enlarged image of the device channel.


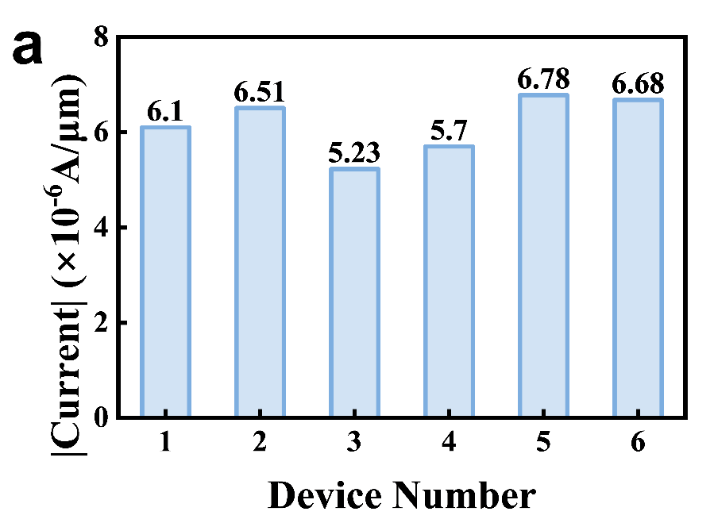


**Fig. S4 | Current-density distribution at 1 V of forward bias for ACNT flexible Schottky diodes.** Histogram of the current density 𝐽 measured at 𝑉 = 1 V for ACNT-FSBDs.

**
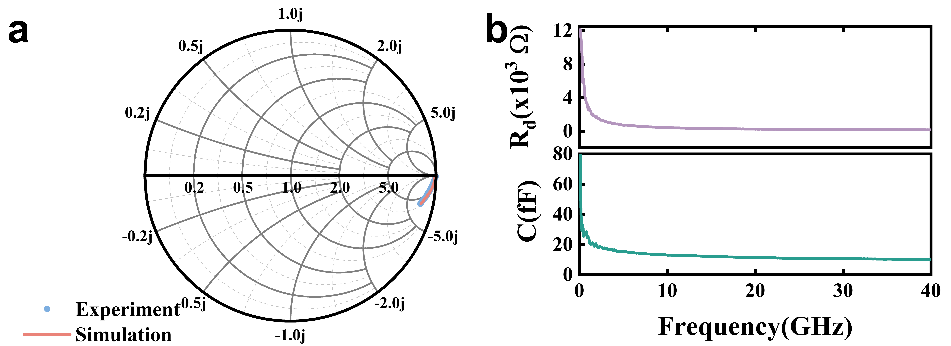
**

**Fig. S5 | a,** Smith chart representation of the flexible Schottky diode with a channel width of 20 μm and a length of 200 nm, measured at 0 V bias. The ADS simulation results are overlaid for comparison, demonstrating the impedance characteristics. **b,** Frequency-dependent variation of resistance (top) and capacitance (bottom) for the diode, spanning from 100 MHz to 40 GHz. Symbols denote values extracted from the measured RF response (experimental data).


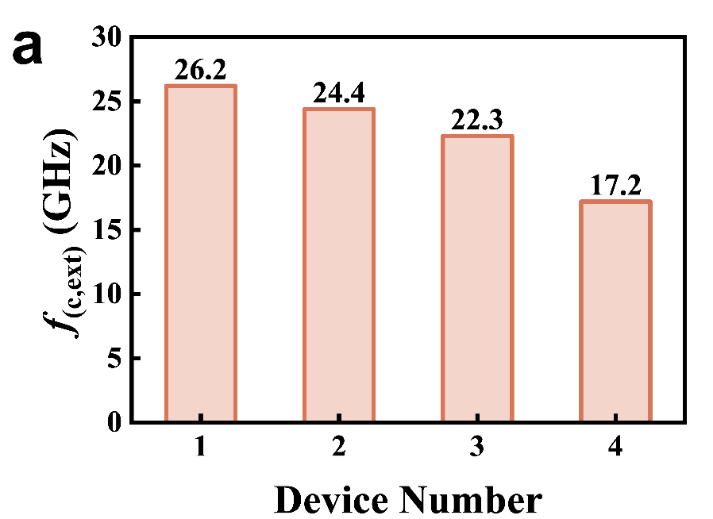


**Fig. S6 | Extrinsic cutoff frequency of CNT-FSBDs.** Histogram showing the extrinsic cutoff frequency *f*c,ext for CNT-FSBDs at zero bias (flat state), aggregated over 4 devices ( W = 60 µm). The 𝑓c,ext is obtained from rectifier measurements as the −3 dB (half-power) point where the rectified output Vout drops to (≈0.707) of its peak (low-frequency) value, thus reflecting parasitic losses of the full device/circuit.


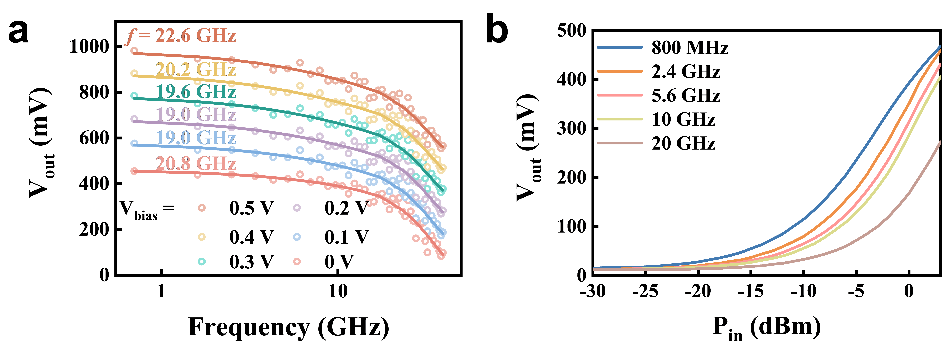


**Fig. S7** **| Extrinsic cutoff frequencies of flexible Schottky diodes based on ACNT arrays at different bias voltages and different power.** **a,** Extrinsic cutoff frequencies of diodes at different bias voltages, measured at an input power of 0 dBm. **b,** Output voltage as a function of input RF power in the Wide power range (-30 to 3 dBm) at five different operating frequencies (800 MHz, 2.4 GHz, 5.6 GHz, 10 GHz, and 20 GHz). The Schottky diode features a channel length of 200 nm and a width of 60 μm, with measurements conducted at 0 V bias, demonstrating its frequency-dependent rectification performance.


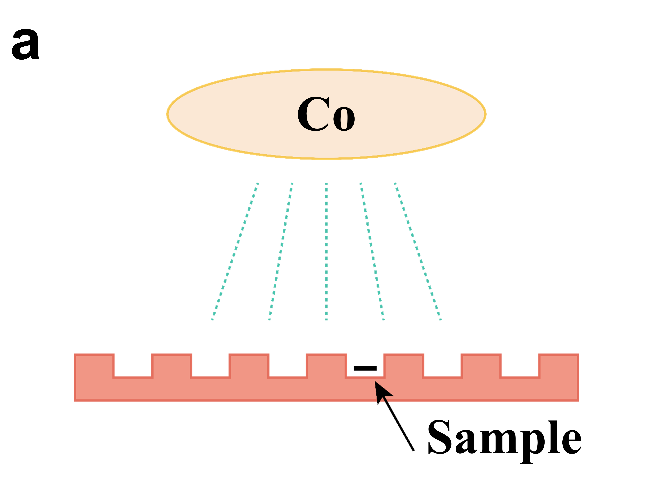


**Fig. S8 | Schematic diagram of radiation-resistant instrument.** The sample platform is a multi-hole plate, and different holes are exposed to different radiation doses.

|  | **Substrate** | | **Current Density at 1V (A/µm)** | ***f*(c,int) (GHz)** | ***f*(c,ext) (GHz)** | **Ref.** |
| --- | --- | --- | --- | --- | --- | --- |
| **Flexible** | **Hard** |
| **ZnO** |  | Glass | 4.52×10-10 | 330 | 10 | 1 |
| **IGZO** | PET |  | 2.53×10-9 | 16.7 | 6.3 | 2 |
|  | Glass |  | 1.8 | 1.1 | 3 |
| **Graphene** | Foil |  | 4.89×10-8 | 100 | \ | 4 |
| **MoS2** | PI |  | 3.11×10-6 | ≥100 | 10 | 5 |
| **GaAs** | PI |  | 5.78×10-5 |  | 4 | 6 |
| CNF |  |  | 15.1 | 5.8 | 7 |
| **Ge** | Plastic |  | \ | 20 |  | 8 |
| Plastic |  |  | 10 |  | 9 |
| **Si** | PET |  | \ | \ | 1.6 | 10 |
| **WSe2** |  | Glass | \ | \ | 10 | 11 |
| **Organic** |  | Glass | \ | \ | 14 | 12 |
| **This work** | PI |  | 3.08×10-5 | ≥335.7 | 28.6 |  |

**Tab. S1 | Benchmarking of key performance metrics.** Current density at 1 V, intrinsic cutoff frequency 𝑓c,int, and extrinsic cutoff frequency 𝑓c,ext compiled from prior reports. Source articles are listed in Supplementary References.

|  | **Substrate** | | **TID (Mrad)** | **Ref.** |
| --- | --- | --- | --- | --- |
| **Flexible** | **Hard** |
| **IGZO** |  | Si | 0.25 | 13, 14 |
| **GaAs** |  | Si-GaAs | 1 | 15 |
| **GaAs-Si** |  | \ | 2 | 16 |
| **Si** |  | Si | 3 | 17 |
| **CNT on** |  | Si | 15 | 18 |
|  | 2.2 | 19 |
|  | 15.5 | 20 |
| **CNT** | PI |  | 2 | 21 |
|  | 4 | 18 |
| **This work** | **PI** |  | **3** |  |

**Tab. S2 | Benchmarking of TID performance.** Literature sources compiled for TID benchmarking of devices discussed in the main text. Full citations are provided in Supplementary References.

**References**

1. Georgiadou D. G.*, et al.* 100 GHz zinc oxide Schottky diodes processed from solution on a wafer scale. *Nat. Electron.* **3**, 718-725 (2020).

2. Zhang J. W., Li Y. P., Zhang B. L., Wang H. B., Xin Q., Song A. M. Flexible indium-gallium-zinc-oxide Schottky diode operating beyond 2.45 GHz. *Nat. Commun.* **6**, 7561 (2015).

3. Chasin A.*, et al.* Gigahertz Operation of a-IGZO Schottky Diodes. *IEEE Trans. Electron Devices.* **60**, 3407-3412 (2013).

4. Wang Z.*, et al.* Flexible One-Dimensional Metal–Insulator–Graphene Diode. *ACS Appl. Electron. Mater.* **1**, 945-950 (2019).

5. Zhang X.*, et al.* Two-dimensional MoS2-enabled flexible rectenna for Wi-Fi-band wireless energy harvesting. *Nature.* **566**, 368-372 (2019).

6. Jung Y. H., Zhang H. L., Lee I. K., Shin J. H., Kim T. I., Ma Z. Q. Releasable High-Performance GaAs Schottky Diodes for Gigahertz Operation of Flexible Bridge Rectifier. *Adv. Electron. Mater.* **5**, 1800772 (2019).

7. Jung Y. H.*, et al.* High-performance green flexible electronics based on biodegradable cellulose nanofibril paper. *Nat. Commun.* **6**, 7170 (2015).

8. Qin G.*, et al.* Experimental characterization and modeling of the bending strain effect on flexible microwave diodes and switches on plastic substrate. *Appl. Phys. Lett.* **99**, 243104 (2011).

9. Qin G. X.*, et al.* Fabrication and Characterization of Flexible Microwave Single-Crystal Germanium Nanomembrane Diodes on a Plastic Substrate. *IEEE Electron Device Lett.* **34**, 160-162 (2013).

10. Sani N.*, et al.* All-printed diode operating at 1.6 GHz. *Proc. Natl. Acad. Sci. U.S.A.* **111**, 11943-11948 (2014).

11. Yang S. J.*, et al.* Ultrafast 27 GHz cutoff frequency in vertical WSe2 Schottky diodes with extremely low contact resistance. *Nat. Commun.* **11**, 1574 (2020).

12. Loganathan K.*, et al.* 14 GHz Schottky Diodes Using a p‐Doped Organic Polymer. *Adv. Mater.* **34**, 2108524 (2022).

13. Guo Z.*, et al.* Total-ionizing-dose effects in IGZO thin-film transistors. *IEEE Trans. Nucl. Sci.* **70**, 2002-2007 (2023).

14. Guo Z.*, et al.* Total-ionizing-dose effects in IGZO thin-film transistors with SiO 2 oxygen-penetration layers. *IEEE Trans. Nucl. Sci.* **77**, 461-468 (2023).

15. Ren S.*, et al.* Total ionizing dose (TID) effects in GaAs MOSFETs with La-based epitaxial gate dielectrics. *IEEE Trans. Nucl. Sci.* **64**, 164-169 (2016).

16. Behera R., Nidhin T., Sakthivel M., Jayanthi T., Madhusoodanan K. Total ionizing dose effects in GaAs-Si based electronic components. In: *2017 Innovations in Power and Advanced Computing Technologies (i-PACT)*). IEEE (2017).

17. Zhang R. Q., Cui J. W., Li Y. D., Guo Q., Zheng Q. W. Total Ionizing Dose Effects on 22 nm UTBB FD-SOI MOSFETs up to 100 Mrad(Si). *IEEE Trans. Electron Devices.* **71**, 3490-3497 (2024).

18. Zhu M. G.*, et al.* Radiation-hardened and repairable integrated circuits based on carbon nanotube transistors with ion gel gates. *Nat. Electron.* **3**, 622-629 (2020).

19. Zhu M. G., Zhang Z., Peng L. M. High‐performance and radiation‐hard carbon nanotube complementary static random‐access memory. *Adv. Electron. Mater.* **5**, 1900313 (2019).

20. Zhu M., Zhou J., Sun P., Peng L.-M., Zhang Z. Analyzing Gamma-Ray Irradiation Effects on Carbon Nanotube Top-Gated Field-Effect Transistors. *ACS Appl. Mater. Interfaces.* **13**, 47756-47763 (2021).

21. Wang X.*, et al.* Ultralow-Power and Radiation-Tolerant Complementary Metal-Oxide-Semiconductor Electronics Utilizing Enhancement-Mode Carbon Nanotube Transistors on Paper Substrates. *Adv. Mater.* **34**, 2204066 (2022).
